# Supplementary material for: A Genome-Wide Association Study of Resistance to Stripe Rust (Puccinia striiformis f. sp. tritici) in a Worldwide Collection of Hexaploid Spring Wheat (Triticum aestivum L.)
Source: PubMed Central journal article supplement (PMC4349098; doi:10.1534/g3.114.014563), 2015-01-20
Supplement: supp_g3.114.014563_FigureS1.pdf [file supp_g3.114.014563_FigureS1.pdf]

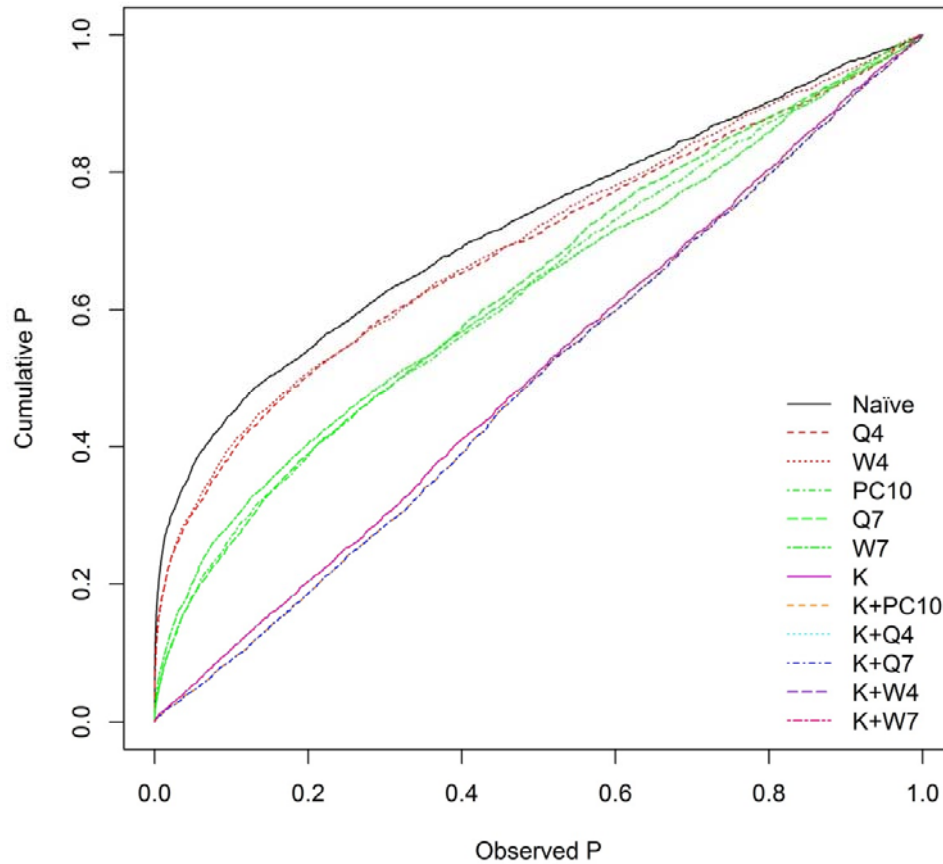

**Figure S1** Plot of observed vs. expected cumulative  $P$  values using different GWAS models. The compared models are based on the IT data from UC Davis, 2011. **Naive**: no population structure correction; **Q4 and Q7**: general linear model (GLM) with STRUCTURE membership coefficients from the four main groups or the 7 subgroups as covariates; **Ward 4 and Ward 7**: GLM with Ward cluster coefficients from the four main groups or the 7 subgroups as covariates; **PC10**: GLM with first 10 principal components as covariates; **K**: mixed linear model (MLM) with the  $875 \times 875$  kinship matrix of identity-by-state (IBS). **K** was then combined with the previous 5 models (**K+Q4**, **K+Q7**, **K+W4**, **K+W7**, **K+PC10**). Genetic similarities were calculated using all 4,585 SNPs.
