# Supplementary material for: A Genome-Wide Association Study of Resistance to Stripe Rust (Puccinia striiformis f. sp. tritici) in a Worldwide Collection of Hexaploid Spring Wheat (Triticum aestivum L.)
Source: PubMed Central journal article supplement (PMC4349098; doi:10.1534/g3.114.014563), 2015-01-20
Supplement: supp_g3.114.014563_FigureS2.pdf [file supp_g3.114.014563_FigureS2.pdf]

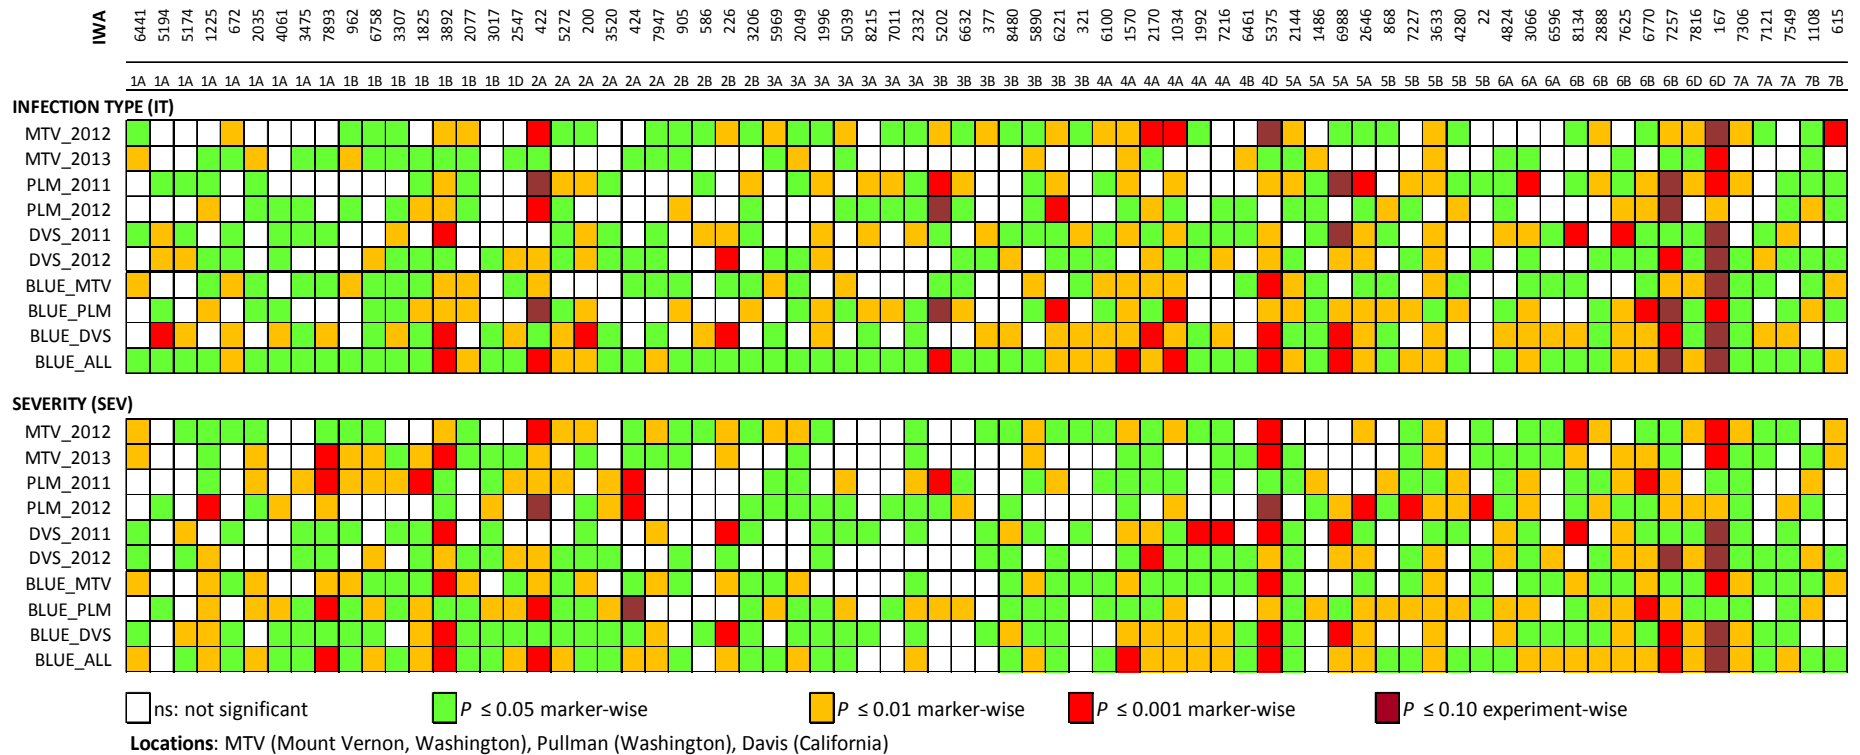

**Figure S2** Selected QTL for *Pst* infection type (IT) and disease severity (SEV) in a collection of 875 spring hexaploid wheat. Only QTL significant in at least 3 environments (with at least one with  $P < 0.01$ ) are reported. Best Linear Unbiased Estimates (BLUEs) are calculated for each location separately and for the 6 combined environments (BLUE\_ALL).
