# Supplementary material for: A Genome-Wide Association Study of Resistance to Stripe Rust (Puccinia striiformis f. sp. tritici) in a Worldwide Collection of Hexaploid Spring Wheat (Triticum aestivum L.)
Source: PubMed Central journal article supplement (PMC4349098; doi:10.1534/g3.114.014563), 2015-01-20
Supplement: supp_g3.114.014563_FigureS3.pdf [file supp_g3.114.014563_FigureS3.pdf]

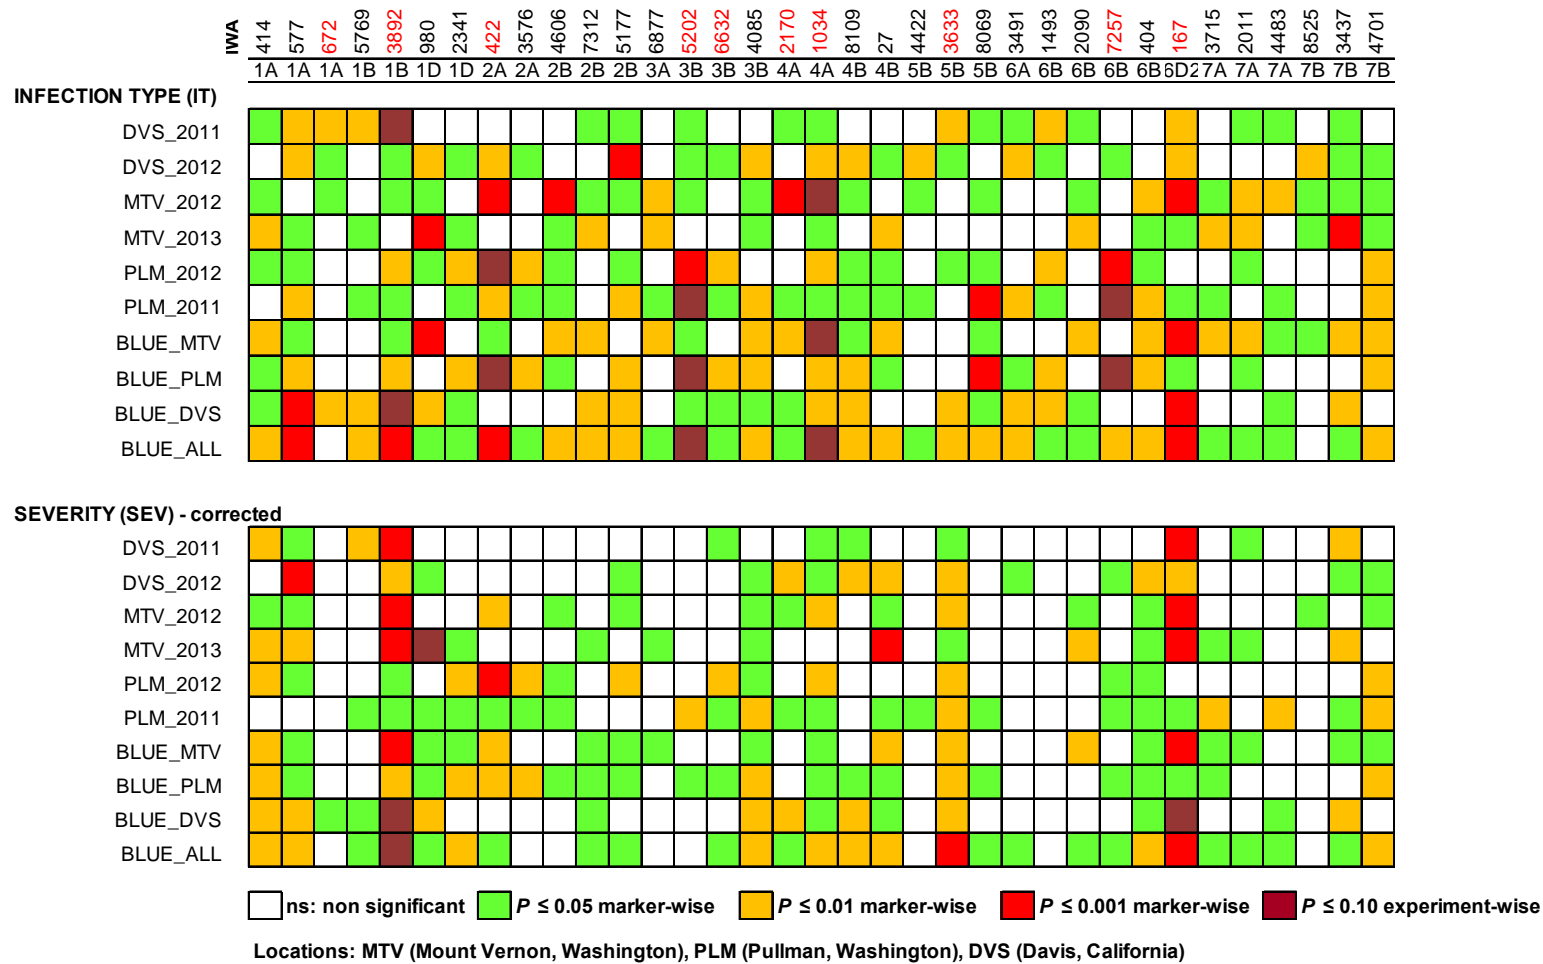

**Figure S3** Selected QTL for partial resistance to *Pst* in a collection of 593 accessions of spring wheat with  $IT \geq 3$ . Only QTL significant in at least 3 environments (with at least one of them with  $P < 0.01$ ) are reported. SNP names in red are also significant in the complete analysis in **Figure S2**. Best linear unbiased estimates (BLUEs) are calculated for each location and for the 6 combined environments (BLUE\_ALL).
