# Supplementary material for: A Genome-Wide Association Study of Resistance to Stripe Rust (Puccinia striiformis f. sp. tritici) in a Worldwide Collection of Hexaploid Spring Wheat (Triticum aestivum L.)
Source: PubMed Central journal article supplement (PMC4349098; doi:10.1534/g3.114.014563), 2015-01-20
Supplement: supp_g3.114.014563_FigureS4.pdf [file supp_g3.114.014563_FigureS4.pdf]

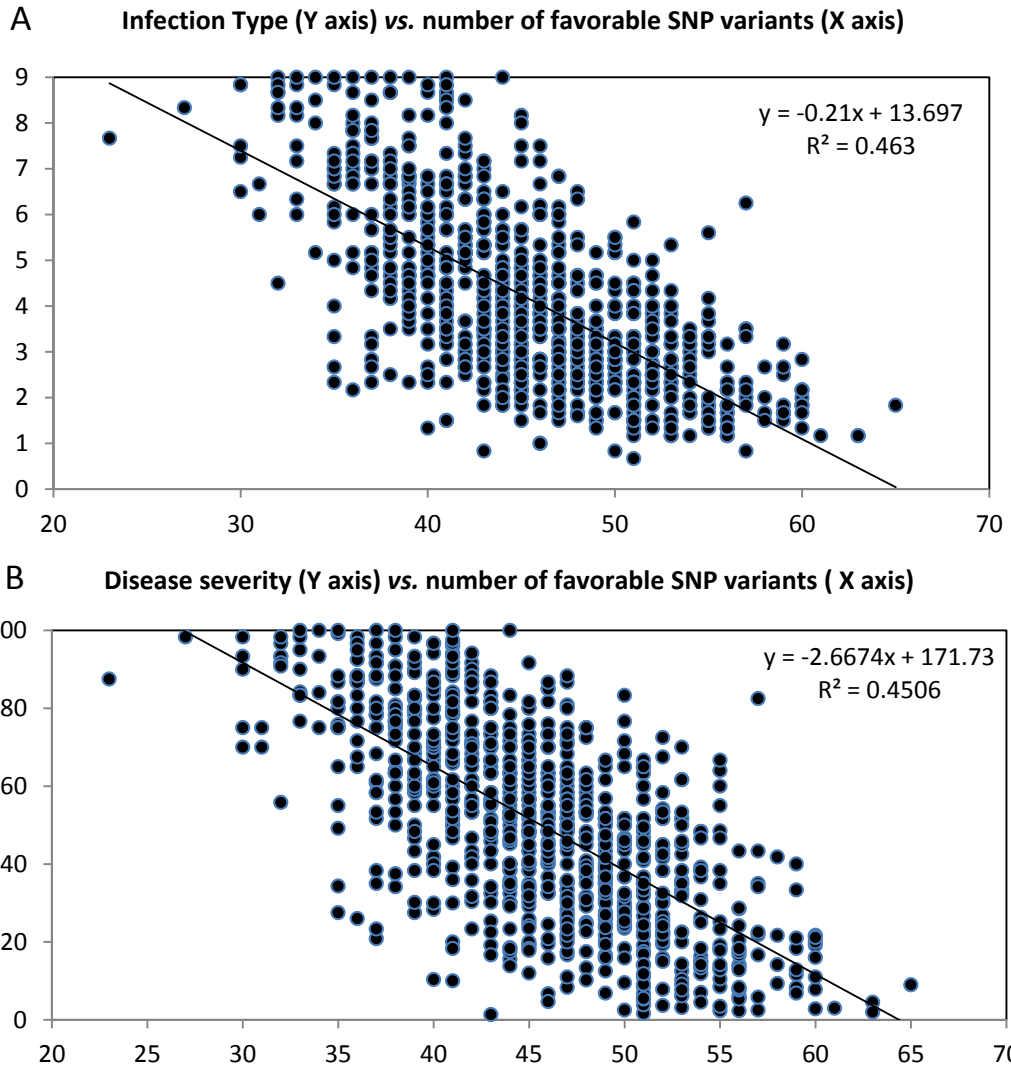

**Figure S4** Regression between **(A)** Infection type (IT) and **(B)** disease severity (SEV) and the number of favorable alleles in each of the 875 lines. Both regressions were highly significant  $P < 0.0001$ . Original data is available in **File S1**.
