# Supplementary material for: A Genome-Wide Association Study of Resistance to Stripe Rust (Puccinia striiformis f. sp. tritici) in a Worldwide Collection of Hexaploid Spring Wheat (Triticum aestivum L.)
Source: PubMed Central journal article supplement (PMC4349098; doi:10.1534/g3.114.014563), 2015-01-20
Supplement: supp_g3.114.014563_FigureS5.pdf [file supp_g3.114.014563_FigureS5.pdf]

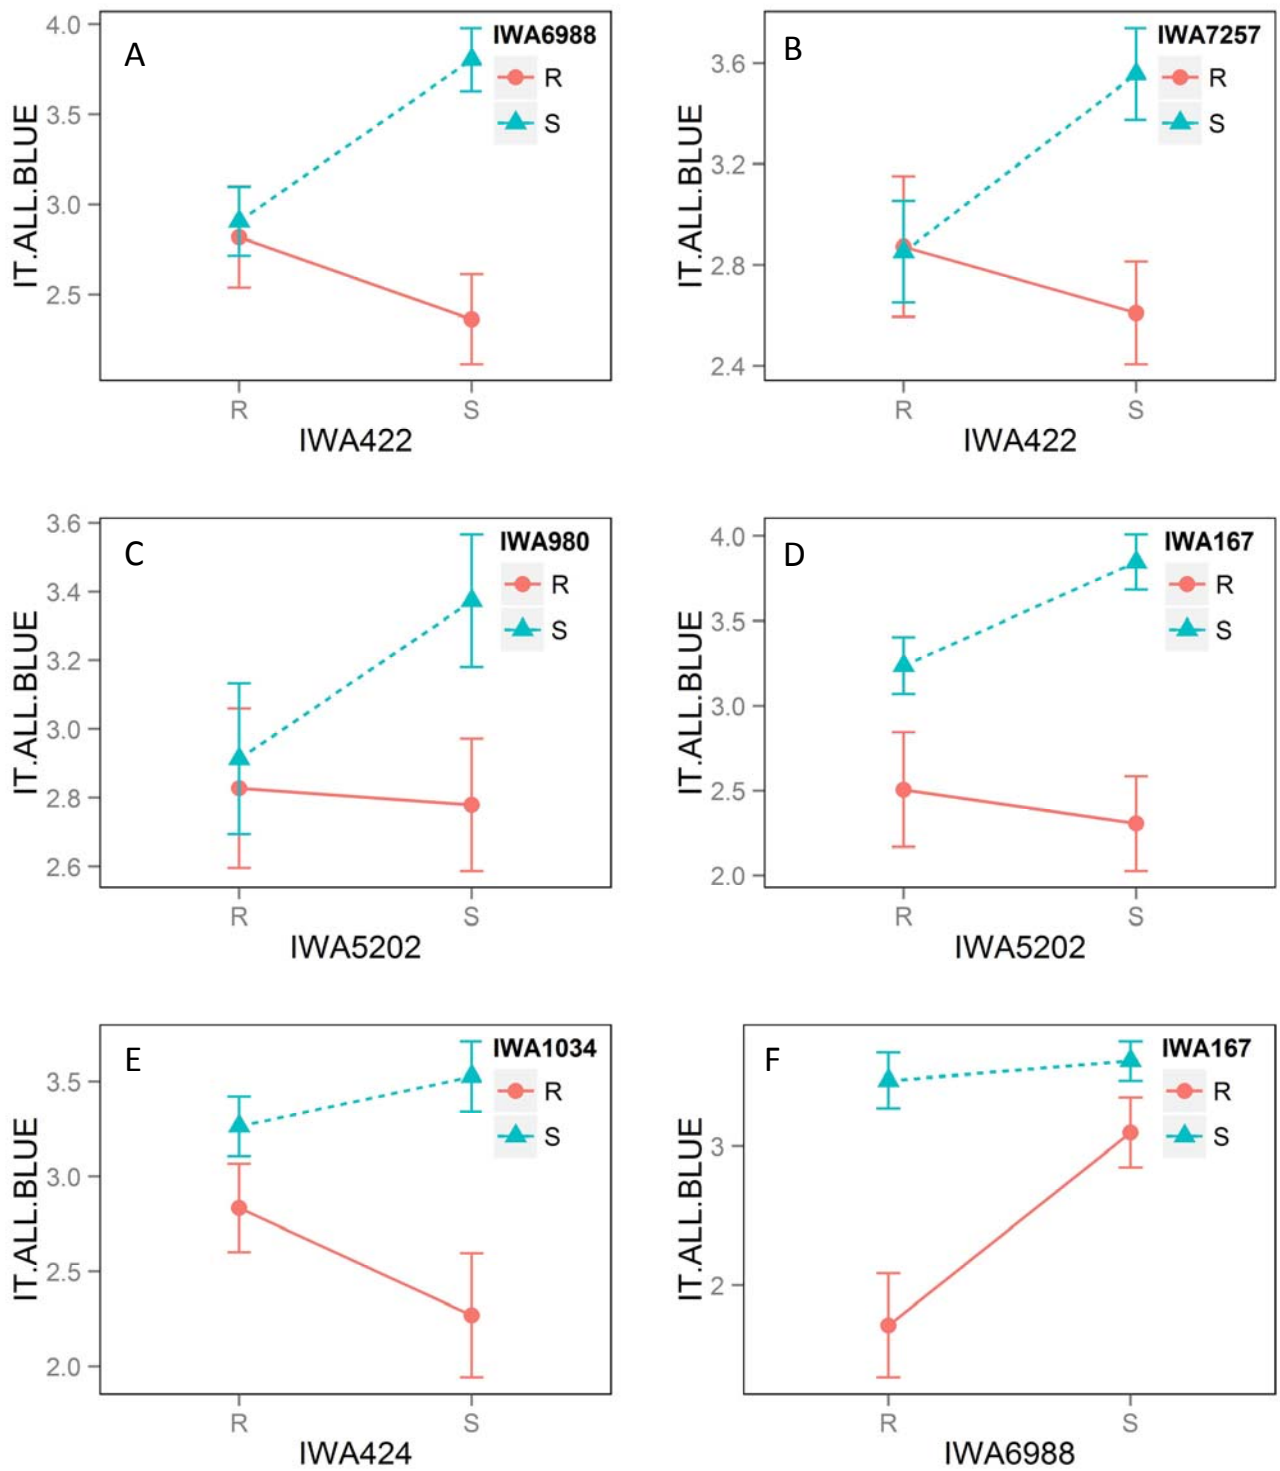

**Figure S5** Significant interactions among 10 selected QTLs (**Table S8**). IT.ALL.BLUE values are the least square means from the full model ANOVA for BLUE values across all locations (**Table S8**)  $\pm$  the standard error of the least square means.
