# Supplementary material for: A Genome-Wide Association Study of Resistance to Stripe Rust (Puccinia striiformis f. sp. tritici) in a Worldwide Collection of Hexaploid Spring Wheat (Triticum aestivum L.)
Source: PubMed Central journal article supplement (PMC4349098; doi:10.1534/g3.114.014563), 2015-01-20
Supplement: supp_g3.114.014563_TableS1.pdf [file supp_g3.114.014563_TableS1.pdf]

**Table S1** Virulence / avirulence formulas for the four *Pst* races used in the GWAS for seedling resistance.

| <i>Pst</i> race code | Virulence / avirulence formula                                                                                      |
|----------------------|---------------------------------------------------------------------------------------------------------------------|
| PSTv-4               | <b>Yr1, Yr6, Yr9, Yr17, Yr27, YrSP, YrTye</b><br>/ Yr5, Yr7, Yr8, Yr10, Yr15, Yr24, Yr32, Yr43, Yr44, YrTr1, YrExp2 |
| PSTv-14              | <b>Yr1, Yr6, Yr7, Yr8, Yr9, Yr17, Yr27, Yr43, Yr44, YrTr1, YrExp2, YrTye</b><br>/ Yr5, Yr10, Yr15, Yr24, Yr32, YrSP |
| PSTv-37              | <b>Yr6, Yr7, Yr8, Yr9, Yr17, Yr27, Yr43, Yr44, YrTr1, YrExp2</b><br>/ Yr1, Yr5, Yr10, Yr15, Yr24, Yr32, YrTye, YrSP |
| PSTv-40              | <b>Yr6, Yr7, Yr8, Yr9, Yr10, Yr24, Yr27, Yr32, Yr43, Yr44, YrTr1, YrExp2</b><br>/ Yr1, Yr5, Yr10, Yr15, YrTye, YrSP |
