# Supplementary material for: A Genome-Wide Association Study of Resistance to Stripe Rust (Puccinia striiformis f. sp. tritici) in a Worldwide Collection of Hexaploid Spring Wheat (Triticum aestivum L.)
Source: PubMed Central journal article supplement (PMC4349098; doi:10.1534/g3.114.014563), 2015-01-20
Supplement: supp_g3.114.014563_TableS2.pdf [file supp_g3.114.014563_TableS2.pdf]

**Table S2 Evaluation of different association models using Bayesian information criterion (BIC) implemented in GAPIT.**

| General Linear Model (GLM) |       |       |       |      |      |      |
|----------------------------|-------|-------|-------|------|------|------|
| Trait <sup>a</sup>         | Naïve | Ward4 | Ward7 | Q4   | Q7   | PC10 |
| IT_DVS_2011                | -421  | -414  | -476  | -414 | -453 | -442 |
| IT_DVS_2012                | -378  | -367  | -468  | -384 | -460 | -429 |
| IT_MTV_2012                | -546  | -548  | -601  | -549 | -602 | -593 |
| IT_MTV_2013                | -438  | -443  | -500  | -436 | -516 | -503 |
| IT_PLM_2011                | -670  | -664  | -759  | -657 | -702 | -679 |
| IT_PLM_2012                | -550  | -537  | -594  | -543 | -575 | -571 |
| SEV_DVS_2011               | 962   | 959   | 861   | 968  | 883  | 900  |
| SEV_DVS_2012               | 1009  | 1015  | 913   | 1008 | 920  | 948  |
| SEV_MTV_2012               | 769   | 768   | 694   | 770  | 689  | 698  |
| SEV_MTV_2013               | 791   | 787   | 700   | 795  | 685  | 708  |
| SEV_PLM_2011               | 643   | 651   | 556   | 664  | 610  | 633  |
| SEV_PLM_2012               | 341   | 354   | 296   | 352  | 319  | 335  |

| Mixed Linear Model (MLM) |             |         |         |      |      |        |
|--------------------------|-------------|---------|---------|------|------|--------|
| Trait                    | K           | K+Ward4 | K+Ward7 | K+Q4 | K+Q7 | K+PC10 |
| IT_DVS_2011              | <b>-575</b> | -559    | -547    | -558 | -543 | -519   |
| IT_DVS_2012              | <b>-555</b> | -536    | -527    | -535 | -528 | -502   |
| IT_MTV_2012              | <b>-748</b> | -729    | -714    | -730 | -717 | -691   |
| IT_MTV_2013              | <b>-645</b> | -625    | -609    | -626 | -613 | -590   |
| IT_PLM_2011              | <b>-865</b> | -846    | -847    | -849 | -834 | -804   |
| IT_PLM_2012              | <b>-714</b> | -695    | -686    | -694 | -677 | -657   |
| SEV_DVS_2011             | <b>787</b>  | 798     | 805     | 806  | 814  | 838    |
| SEV_DVS_2012             | <b>826</b>  | 844     | 850     | 845  | 852  | 880    |
| SEV_MTV_2012             | <b>540</b>  | 557     | 573     | 559  | 571  | 593    |
| SEV_MTV_2013             | <b>557</b>  | 576     | 589     | 577  | 586  | 609    |
| SEV_PLM_2011             | <b>451</b>  | 469     | 467     | 468  | 479  | 510    |
| SEV_PLM_2012             | <b>139</b>  | 155     | 167     | 159  | 175  | 198    |

**Naïve**: no population structure correction; **Q4** and **Q7**: general linear model (GLM) with STRUCTURE membership coefficients from the four main groups or the 7 subgroups as covariates; **Ward4** and **Ward7**: GLM with Ward cluster coefficients from the four main groups or the 7 subgroups as covariates; **PC10**: GLM with first 10 principal components as covariates; **K**: mixed linear model (MLM) with the 875 × 875 kinship matrix of identity-by-state (IBS). Genetic similarities were calculated using all 4585 SNPs. Then K was combined with the previous 5 models (**K+Q4**, **K+Q7**, **K+Ward4**, **K+Ward7**, **K+PC10**). The lowest BIC values (the best models) for each trait are indicated in bold. The BIC values for IT and SEV have opposite signs due to the transformation.

<sup>a</sup> IT = infection type; SEV = Disease severity; DVS = Davis, CA; MTV = Mount Vernon, WA; PLM = Pullman, WA.
