# Supplementary material for: A Genome-Wide Association Study of Resistance to Stripe Rust (Puccinia striiformis f. sp. tritici) in a Worldwide Collection of Hexaploid Spring Wheat (Triticum aestivum L.)
Source: PubMed Central journal article supplement (PMC4349098; doi:10.1534/g3.114.014563), 2015-01-20
Supplement: supp_g3.114.014563_TableS3.pdf [file supp_g3.114.014563_TableS3.pdf]

**Table S3 Pearson’s correlation coefficients among the best linear unbiased estimates (BLUEs) of infection type (IT) and disease severity (SEV) response to *Pst* in single locations (MTV, PLM, and DVS)<sup>a</sup> and combined locations (ALL)<sup>a</sup> based on 875 spring wheat accessions from the NSGC. All correlation coefficients are highly significant ( $P < 0.0001$ ).**

| BLUE <sup>a</sup> | IT_PLM | IT_DVS | IT_ALL | SEV_MTV | SEV_PLM | SEV_DVS | SEV_ALL |
|-------------------|--------|--------|--------|---------|---------|---------|---------|
| IT_MTV            | 0.77   | 0.73   | 0.92   | 0.92    | 0.76    | 0.74    | 0.88    |
| IT_PLM            |        | 0.75   | 0.92   | 0.71    | 0.86    | 0.70    | 0.82    |
| IT_DVS            |        |        | 0.90   | 0.71    | 0.73    | 0.90    | 0.86    |
| IT_ALL            |        |        |        | 0.85    | 0.86    | 0.85    | 0.93    |
| SEV_MTV           |        |        |        |         | 0.77    | 0.76    | 0.93    |
| SEV_PLM           |        |        |        |         |         | 0.73    | 0.90    |
| SEV_DVS           |        |        |        |         |         |         | 0.92    |
| SEV_ALL           |        |        |        |         |         |         |         |

<sup>a</sup> Locations: MTV = Mount Vernon, WA; PLM = Pullman, WA; DVS = Davis, CA; ALL = all environments.
