# Supplementary material for: A Genome-Wide Association Study of Resistance to Stripe Rust (Puccinia striiformis f. sp. tritici) in a Worldwide Collection of Hexaploid Spring Wheat (Triticum aestivum L.)
Source: PubMed Central journal article supplement (PMC4349098; doi:10.1534/g3.114.014563), 2015-01-20
Supplement: supp_g3.114.014563_TableS4.pdf [file supp_g3.114.014563_TableS4.pdf]

**Table S4 Loci associated with significant differences in *Pst* resistance in at least three environments (one at  $P < 0.01$ ) in a collection of 875 spring wheat accessions.**

| Chr. | Pos. <sup>a</sup><br>(cM) | QTL-representative SNP |                      |                    | Associated SNP <sup>e</sup> |            | PSTv races IT<br>(-log $P$ ) <sup>g</sup> |            |            |                     | <i>Pst</i> response<br>(-log $P$ ) <sup>g</sup> |  |
|------|---------------------------|------------------------|----------------------|--------------------|-----------------------------|------------|-------------------------------------------|------------|------------|---------------------|-------------------------------------------------|--|
|      |                           | Index <sup>b</sup>     | Alleles <sup>c</sup> | Freq. <sup>d</sup> | Index IWA                   | 4          | 14                                        | 37         | 40         | IT-ALL <sup>f</sup> | SEV-ALL <sup>f</sup>                            |  |
| 1A   | 39.0                      | IWA6441                | T/C                  | 0.56               | -                           | -          | -                                         | -          | -          | 1.5                 | <b>2.1</b>                                      |  |
| 1A   | 58.0                      | IWA5194                | A/G                  | 0.32               | -                           | -          | -                                         | -          | -          | 1.4                 | 1.3                                             |  |
| 1A   | 59.6                      | IWA4061                | A/G                  | 0.63               | 4646, 4071                  | -          | -                                         | -          | 1.4        | 1.6                 | 1.4                                             |  |
| 1A   | 84.2                      | IWA3475                | T/C                  | 0.58               | 5277, 7018, 7898            | -          | -                                         | -          | -          | 1.6                 | 1.6                                             |  |
| 1A   | 88.1                      | IWA5174                | A/C                  | 0.39               | 6707, 6708                  | -          | -                                         | -          | -          | 1.5                 | 1.5                                             |  |
| 1A   | 120.3                     | IWA1225                | T/G                  | 0.69               | 3145                        | -          | 1.3                                       | -          | -          | <b>2.0</b>          | <b>2.8</b>                                      |  |
| 1A   | 148.1                     | IWA672                 | A/G                  | 0.36               | -                           | -          | -                                         | -          | -          | <b>2.0</b>          | 1.6                                             |  |
| 1A   | 158.6                     | IWA7893                | T/C                  | 0.83               | 1368                        | -          | -                                         | -          | <b>2.0</b> | 1.7                 | <b>3.2</b>                                      |  |
| 1A   | 173.7                     | IWA2035                | A/G                  | 0.63               | 1560, 693                   | -          | -                                         | -          | -          | 1.6                 | <b>2.2</b>                                      |  |
| 1B   | 35.5                      | IWA962                 | A/G                  | 0.14               | 4389                        | -          | -                                         | -          | -          | 1.6                 | 1.9                                             |  |
| 1B   | 51.9                      | IWA6758                | A/G                  | 0.31               | 189, 890, 6073              | 1.4        | -                                         | -          | -          | 1.9                 | <b>2.0</b>                                      |  |
| 1B   | 57.6                      | IWA3307                | T/C                  | 0.49               | -                           | -          | -                                         | -          | -          | 1.8                 | 1.6                                             |  |
| 1B   | 94.7                      | IWA3017                | A/G                  | 0.11               | -                           | -          | -                                         | <b>4.0</b> | -          | 1.3                 | 1.9                                             |  |
| 1B   | 109.3                     | IWA1825                | T/C                  | 0.35               | 5847, 1069, 3043            | -          | -                                         | -          | -          | <b>2.0</b>          | <b>2.4</b>                                      |  |
| 1B   | 123.4                     | IWA3892                | A/G                  | 0.70               | 846                         | -          | -                                         | -          | 1.3        | <b>3.2</b>          | <b>3.5</b>                                      |  |
| 1B   | 141.2                     | IWA2077                | A/G                  | 0.18               | 6647                        | 1.9        | -                                         | -          | -          | <b>2.1</b>          | <b>2.0</b>                                      |  |
| 1D   | 21.4                      | IWA2547                | T/C                  | 0.11               | -                           | <b>3.0</b> | -                                         | -          | -          | 1.8                 | <b>2.2</b>                                      |  |
| 2A   | 9.9                       | <b>IWA422</b>          | T/C                  | 0.31               | 423, 3468, 3469             | -          | 1.6                                       | -          | -          | <b>3.9</b>          | <b>3.2</b>                                      |  |
| 2A   | 62.2                      | IWA3520                | A/C                  | 0.52               | -                           | -          | -                                         | -          | -          | 1.4                 | 1.8                                             |  |
| 2A   | 78.3                      | <b>IWA424</b>          | T/C                  | 0.70               | -                           | -          | 1.9                                       | -          | <b>2.0</b> | 1.5                 | <b>2.7</b>                                      |  |
| 2A   | 96.2                      | IWA5272                | A/G                  | 0.52               | 5273                        | -          | -                                         | -          | -          | <b>2.1</b>          | <b>2.1</b>                                      |  |
| 2A   | 110.6                     | IWA7947                | A/C                  | 0.71               | -                           | -          | -                                         | -          | 1.4        | <b>2.2</b>          | <b>2.2</b>                                      |  |
| 2A   | 160.2                     | IWA200                 | A/G                  | 0.84               | -                           | -          | -                                         | -          | -          | <b>2.1</b>          | <b>2.0</b>                                      |  |
| 2B   | 112.3                     | IWA905                 | A/G                  | 0.82               | -                           | -          | -                                         | -          | -          | 1.5                 | 1.4                                             |  |
| 2B   | 147.3                     | IWA586                 | T/C                  | 0.62               | 587, 4464                   | -          | -                                         | -          | -          | 1.5                 | 1.3                                             |  |
| 2B   | 163.4                     | IWA226                 | T/C                  | 0.54               | 2294                        | 1.4        | 1.9                                       | -          | <b>2.1</b> | 1.7                 | <b>2.3</b>                                      |  |
| 2B   | 266.4                     | IWA3206                | T/C                  | 0.12               | 1668, 3206, 4619            | <b>2.7</b> | -                                         | -          | <b>2.0</b> | 1.9                 | 1.6                                             |  |
| 3A   | 13.2                      | IWA5969                | T/C                  | 0.14               | -                           | -          | -                                         | 1.4        | -          | 1.9                 | 1.9                                             |  |
| 3A   | 27.5                      | IWA2049                | T/C                  | 0.14               | 2048, 7085, 2047, 7086      | -          | -                                         | -          | -          | 1.7                 | <b>2.1</b>                                      |  |
| 3A   | 35.0                      | IWA1996                | A/G                  | 0.87               | 885                         | 1.3        | 1.5                                       | -          | -          | 1.9                 | 1.6                                             |  |
| 3A   | 59.4                      | IWA5039                | T/C                  | 0.64               | 6877, 1308                  | -          | -                                         | -          | <b>2.7</b> | 1.9                 | 1.8                                             |  |
| 3A   | 70.4                      | IWA8215                | T/G                  | 0.27               | -                           | 1.3        | -                                         | -          | -          | 1.8                 | -                                               |  |
| 3A   | 75.2                      | IWA7011                | A/G                  | 0.24               | -                           | -          | 1.5                                       | -          | -          | 1.8                 | 1.3                                             |  |
| 3A   | 102.9                     | IWA2332                | A/G                  | 0.35               | 7440                        | -          | -                                         | -          | -          | 1.8                 | <b>2.2</b>                                      |  |
| 3B   | 3.9                       | <b>IWA5202</b>         | A/G                  | 0.37               | 4796                        | -          | -                                         | -          | -          | <b>3.4</b>          | 1.3                                             |  |
| 3B   | 57.4                      | IWA6632                | A/C                  | 0.75               | -                           | -          | -                                         | -          | -          | 1.9                 | 1.3                                             |  |
| 3B   | 73.8                      | IWA377                 | T/C                  | 0.76               | 2622                        | -          | -                                         | -          | -          | 1.4                 | -                                               |  |
| 3B   | 77.5                      | IWA8480                | A/G                  | 0.14               | -                           | -          | -                                         | -          | -          | 1.4                 | 1.8                                             |  |
| 3B   | 84.5                      | IWA5890                | T/C                  | 0.53               | -                           | -          | -                                         | -          | -          | 1.7                 | <b>2.1</b>                                      |  |
| 3B   | 95.5                      | IWA6221                | T/C                  | 0.75               | -                           | -          | -                                         | -          | -          | <b>2.4</b>          | 1.8                                             |  |
| 3B   | 101.4                     | IWA321                 | T/C                  | 0.11               | -                           | -          | -                                         | -          | -          | <b>2.0</b>          | -                                               |  |
| 4A   | 35.2                      | IWA6100                | A/G                  | 0.33               | 4251                        | -          | -                                         | -          | -          | <b>2.4</b>          | 1.9                                             |  |

**Table S4** Continuation

|    |       |                |            |      |                                          |            |             |            |     |            |            |
|----|-------|----------------|------------|------|------------------------------------------|------------|-------------|------------|-----|------------|------------|
| 4A | 44.0  | IWA1992        | <u>A/G</u> | 0.58 | -                                        | -          | -           | 1.4        | -   | 1.3        | <b>2.2</b> |
| 4A | 54.9  | IWA7216        | <u>T/C</u> | 0.53 | -                                        | -          | -           | -          | -   | 1.6        | <b>2.0</b> |
| 4A | 68.1  | IWA1570        | <u>T/G</u> | 0.17 | 5687, 3489, 3490, 5036,8, 7203           | <b>2.4</b> | -           | -          | -   | <b>3.2</b> | <b>3.0</b> |
| 4A | 167.3 | IWA2170        | <u>A/G</u> | 0.37 | 7765, 1066, 6690                         | -          | -           | -          | -   | <b>2.4</b> | <b>2.3</b> |
| 4A | 181.7 | IWA1034        | <u>T/C</u> | 0.17 | -                                        | -          | -           | -          | -   | <b>3.4</b> | <b>2.6</b> |
| 4B | 85.2  | IWA6461        | <u>T/C</u> | 0.54 | -                                        | -          | -           | -          | -   | 1.7        | 1.6        |
| 4D | 26.9  | <b>IWA5375</b> | <u>I/G</u> | 0.10 | 5766                                     | 1.8        | -           | -          | -   | <b>3.0</b> | <b>3.9</b> |
| 5A | 4.9   | IWA2144        | <u>I/C</u> | 0.19 | 2143, 2146                               | -          | -           | -          | -   | <b>2.2</b> | 1.6        |
| 5A | 119.3 | IWA1486        | <u>I/C</u> | 0.24 | 4648                                     | -          | -           | <b>2.0</b> | -   | 1.7        | -          |
| 5A | 189.2 | <b>IWA6988</b> | <u>I/C</u> | 0.16 | -                                        | -          | 1.7         | -          | -   | <b>3.0</b> | <b>2.2</b> |
| 5A | 194.9 | IWA2646        | <u>A/G</u> | 0.35 | -                                        | 1.4        | -           | 1.3        | -   | <b>2.6</b> | <b>2.3</b> |
| 5B | 0.0   | IWA868         | <u>I/C</u> | 0.19 | 757                                      | -          | -           | -          | -   | 1.9        | 1.6        |
| 5B | 68.3  | IWA7227        | <u>T/C</u> | 0.31 | -                                        | -          | <b>3.0</b>  | 1.5        | -   | <b>2.1</b> | 1.7        |
| 5B | 85.9  | IWA3633        | <u>T/C</u> | 0.54 | -                                        | -          | -           | -          | -   | <b>2.8</b> | <b>2.8</b> |
| 5B | 119.9 | IWA4280        | <u>A/G</u> | 0.10 | 8069, 7815                               | -          | <b>24.0</b> | <b>8.0</b> | -   | 1.7        | 1.6        |
| 5B | 205.8 | IWA22          | <u>A/G</u> | 0.26 | -                                        | -          | -           | -          | -   | -          | 1.6        |
| 6A | 75.5  | IWA4824        | <u>A/G</u> | 0.44 | -                                        | 1.4        | -           | <b>3.1</b> | 1.4 | 1.8        | 1.8        |
| 6A | 114.5 | IWA6596        | <u>I/C</u> | 0.51 | 1671, 5074, 6508                         | -          | -           | -          | -   | 1.5        | <b>2.0</b> |
| 6A | 217.7 | IWA3066        | <u>A/G</u> | 0.72 | 3203, 3204                               | 1.4        | -           | -          | -   | <b>2.4</b> | <b>2.4</b> |
| 6B | 37.9  | IWA8134        | <u>T/C</u> | 0.10 | -                                        | -          | -           | <b>2.3</b> | -   | 1.7        | <b>2.5</b> |
| 6B | 38.5  | IWA2888        | <u>T/C</u> | 0.65 | 1905, 1657                               | -          | 1.6         | -          | -   | 1.6        | <b>2.4</b> |
| 6B | 50.8  | IWA7625        | <u>A/G</u> | 0.44 | 2419, 1655, 2417, 2420, 4823, 4825, 4827 | 1.9        | -           | <b>3.1</b> | 1.6 | <b>2.3</b> | <b>2.3</b> |
| 6B | 84.5  | IWA6770        | <u>A/G</u> | 0.52 | 3289, 6660                               | -          | -           | -          | 1.4 | <b>2.5</b> | <b>2.6</b> |
| 6B | 112.3 | <b>IWA7257</b> | <u>I/G</u> | 0.23 | -                                        | -          | -           | -          | -   | <b>5.0</b> | <b>3.2</b> |
| 6D | 68.6  | IWA7816        | <u>A/G</u> | 0.63 | -                                        | <b>2.3</b> | -           | -          | -   | <b>2.2</b> | <b>2.1</b> |
| 6D | 73.2  | <b>IWA167</b>  | <u>A/C</u> | 0.10 | -                                        | -          | -           | -          | -   | <b>5.5</b> | <b>4.5</b> |
| 7A | 6.2   | IWA7306        | <u>A/G</u> | 0.53 | -                                        | 1.4        | -           | -          | -   | 1.7        | <b>2.2</b> |
| 7A | 49.9  | IWA7121        | <u>I/G</u> | 0.70 | -                                        | -          | -           | -          | -   | 1.6        | 1.6        |
| 7A | 105.5 | IWA7549        | <u>A/C</u> | 0.83 | -                                        | -          | -           | -          | -   | <b>2.0</b> | <b>2.0</b> |
| 7B | 40.6  | IWA1108        | <u>I/C</u> | 0.27 | 6143, 8233                               | -          | -           | -          | -   | 1.9        | 1.7        |
| 7B | 107.4 | IWA615         | <u>T/C</u> | 0.18 | -                                        | -          | 1.8         | -          | 1.3 | <b>2.0</b> | 1.7        |

<sup>a</sup> Scaled position from hexaploid wheat consensus map (Cavanagh et al. 2013).

<sup>b</sup> SNP indexes from Illumina iSelect 9K wheat assay (Cavanagh et al. 2013). **Bold**: QTL with experiment –wise Bonferroni  $P < 0.1$

<sup>c</sup> SNP variant associated to the resistant response is underlined.

<sup>d</sup> Frequency of the favorable SNP variant.

<sup>e</sup> SNP loci in LD with the representative SNP and significantly associated to the *Pst* response (IWA).

<sup>f</sup> IT= infection type , SEV= disease severity. IT-ALL and SEV-ALL, best linear unbiased estimates (BLUEs) over all environments.

<sup>g</sup> Significances are reported as  $-\log(P \text{ value})$ : ‘-’ = not-significant, 1.3 =  $P=0.05$ , values  $> 2$  are in **bold**, and value  $\geq 4$  (experiment-wise significant at  $\alpha = 0.10$ ) are in **bold underlined**.
