# Supplementary material for: A Genome-Wide Association Study of Resistance to Stripe Rust (Puccinia striiformis f. sp. tritici) in a Worldwide Collection of Hexaploid Spring Wheat (Triticum aestivum L.)
Source: PubMed Central journal article supplement (PMC4349098; doi:10.1534/g3.114.014563), 2015-01-20
Supplement: supp_g3.114.014563_TableS5.pdf [file supp_g3.114.014563_TableS5.pdf]

**Table S5 Loci associated with significant differences in partial resistance to *Pst* in at least three environments (one at  $P < 0.01$ ) in a collection of 593 spring hexaploid wheat with infection type  $\geq 3$ .**

| Chr. | Pos. <sup>a</sup><br>(cM) | QTL-representative SNP |                      | Associated SNP <sup>e</sup> |                                                             | PSTv races<br>IT (-log P) <sup>g</sup> |            |            |            | Pst response <sup>f</sup><br>(-log P) <sup>g</sup> |            |
|------|---------------------------|------------------------|----------------------|-----------------------------|-------------------------------------------------------------|----------------------------------------|------------|------------|------------|----------------------------------------------------|------------|
|      |                           | Index <sup>b</sup>     | Alleles <sup>c</sup> | Freq. <sup>d</sup>          | IWA index                                                   | 4                                      | 14         | 37         | 40         | IT-ALL                                             | SEV-ALL    |
| 1A   | 28.2                      | IWA414                 | T/ <u>G</u>          | 0.62                        | 4644, 4506                                                  | -                                      | -          | -          | -          | <b>2.4</b>                                         | <b>2.8</b> |
| 1A   | 111.2                     | IWA577                 | <u>A</u> /C          | 0.46                        | 4538, 1081, 5832, 578                                       | -                                      | -          | -          | -          | <b>3.1</b>                                         | <b>2.9</b> |
| 1A   | 148.1                     | IWA672 *               | A/ <u>G</u>          | 0.36                        | -                                                           | -                                      | -          | -          | -          | -                                                  | -          |
| 1B   | 93.5                      | IWA5769                | A/ <u>G</u>          | 0.20                        | 5862, 8246, 3017                                            | -                                      | -          | <b>4.0</b> | -          | <b>2.0</b>                                         | 1.7        |
| 1B   | 123.4                     | <b>IWA3892</b> *       | <u>A</u> /G          | 0.70                        | 846 <sup>h</sup>                                            | -                                      | -          | -          | 1.3        | <b>3.1</b>                                         | <b>4.2</b> |
| 1D   | 49.3                      | <b>IWA980</b>          | <u>A</u> /C          | 0.44                        | 642                                                         | -                                      | -          | -          | -          | 1.7                                                | 1.7        |
| 1D   | 91.5                      | IWA2341                | T/ <u>C</u>          | 0.37                        | 2340                                                        | <b>2.6</b>                             | -          | 1.8        | 1.5        | <b>2.0</b>                                         | <b>2.2</b> |
| 2A   | 9.9                       | <b>IWA422</b> *        | T/ <u>C</u>          | 0.31                        | 423, 3468, 3469                                             | -                                      | 1.6        | -          | -          | <b>3.1</b>                                         | 1.9        |
| 2A   | 177.7                     | IWA3576                | T/ <u>C</u>          | 0.18                        | -                                                           | -                                      | -          | -          | -          | 1.5                                                | -          |
| 2B   | 126.3                     | IWA4606                | T/ <u>C</u>          | 0.39                        | 1102, 1127, 1128, 1129, 1130, 1131, 1177, 1188 <sup>i</sup> | -                                      | -          | -          | -          | <b>2.3</b>                                         | 1.3        |
| 2B   | 149.4                     | IWA7312                | <u>A</u> /G          | 0.81                        | -                                                           | -                                      | -          | -          | -          | <b>2.1</b>                                         | 1.9        |
| 2B   | 197.2                     | IWA5177                | <u>T</u> /C          | 0.81                        | 7615, 2379, 4900                                            | -                                      | -          | -          | -          | <b>2.9</b>                                         | 1.9        |
| 3A   | 59.4                      | IWA6877                | <u>T</u> /C          | 0.11                        | 5039, 1308                                                  | -                                      | -          | -          | <b>2.7</b> | 1.5                                                | -          |
| 3B   | 3.9                       | <b>IWA5202</b> *       | <u>A</u> /G          | 0.37                        | 4796, 4801                                                  | -                                      | -          | -          | -          | <b>4.1</b>                                         | -          |
| 3B   | 57.4                      | IWA6632 *              | <u>A</u> /C          | 0.75                        | -                                                           | -                                      | -          | -          | -          | <b>2.0</b>                                         | 1.4        |
| 3B   | 88.1                      | IWA4085                | T/ <u>C</u>          | 0.68                        | 7519, 8196                                                  | -                                      | -          | -          | -          | <b>2.6</b>                                         | <b>2.2</b> |
| 4A   | 167.3                     | IWA2170 *              | A/ <u>G</u>          | 0.37                        | 7765, 1066, 6690                                            | -                                      | -          | -          | -          | 1.4                                                | 1.8        |
| 4A   | 181.7                     | <b>IWA1034</b> *       | T/ <u>C</u>          | 0.17                        | 1034, 6696                                                  | -                                      | -          | -          | -          | <b>4.1</b>                                         | <b>2.7</b> |
| 4B   | 26.4                      | IWA8109                | A/ <u>G</u>          | 0.72                        | 7311                                                        | 1.3                                    | -          | -          | -          | <b>2.8</b>                                         | <b>2.4</b> |
| 4B   | 116.4                     | IWA27                  | A/ <u>G</u>          | 0.62                        | 3781                                                        | -                                      | -          | -          | -          | <b>2.2</b>                                         | <b>2.1</b> |
| 5B   | 0.0                       | IWA868 *               | <u>T</u> /C          | 0.19                        | 757                                                         | -                                      | -          | -          | -          | <b>2.6</b>                                         | 1.7        |
| 5B   | 85.9                      | IWA3633 *              | T/ <u>C</u>          | 0.54                        | -                                                           | -                                      | -          | -          | -          | <b>2.3</b>                                         | <b>3.0</b> |
| 5B   | 115.3                     | IWA8069                | <u>A</u> /G          | 0.28                        | 2335, 2336, 8187                                            | -                                      | <b>4.1</b> | 1.6        | -          | <b>2.7</b>                                         | 1.5        |
| 6A   | 138.6                     | IWA3491                | <u>T</u> /C          | 0.84                        | 4950                                                        | -                                      | -          | -          | -          | <b>2.3</b>                                         | 1.4        |
| 6B   | 0.6                       | IWA1493                | A/ <u>C</u>          | 0.14                        | 1492                                                        | -                                      | -          | -          | -          | 1.6                                                | -          |
| 6B   | 60.1                      | IWA2090                | <u>A</u> /G          | 0.20                        | 3869, 3167, 3634, 2244                                      | -                                      | -          | -          | -          | 1.6                                                | 1.4        |
| 6B   | 112.3                     | <b>IWA7257</b> *       | <u>T</u> /G          | 0.23                        | -                                                           | -                                      | -          | -          | -          | <b>2.5</b>                                         | 1.4        |
| 6B   | 118.5                     | IWA404                 | <u>T</u> /C          | 0.69                        | 405                                                         | -                                      | -          | -          | -          | <b>2.0</b>                                         | <b>2.2</b> |
| 6D2  | 73.2                      | <b>IWA167</b> *        | A/ <u>C</u>          | 0.10                        | 7816                                                        | -                                      | -          | -          | -          | <b>3.8</b>                                         | <b>3.9</b> |
| 7A   | 56.4                      | IWA3715                | T/ <u>C</u>          | 0.62                        | 7161, 1156                                                  | -                                      | -          | 1.5        | -          | 1.4                                                | 1.5        |
| 7A   | 106.2                     | IWA2011                | <u>A</u> /G          | 0.69                        | 2009, 4288, 6004                                            | -                                      | -          | -          | -          | 1.9                                                | <b>2.0</b> |
| 7A   | 145.3                     | IWA4483                | <u>A</u> /G          | 0.57                        | -                                                           | -                                      | -          | -          | -          | 1.5                                                | 1.4        |
| 7B   | 48.0                      | IWA8525                | A/ <u>G</u>          | 0.26                        | -                                                           | -                                      | -          | -          | -          | -                                                  | -          |

|    |      |         |             |      |                                           |   |     |   |   |            |            |
|----|------|---------|-------------|------|-------------------------------------------|---|-----|---|---|------------|------------|
| 7B | 65.6 | IWA3437 | A/ <u>G</u> | 0.59 | 306, 3438, 3691, 3812, 4250,<br>507, 6712 | - | -   | - | - | 1.8        | 1.9        |
| 7B | 99.0 | IWA4701 | T/ <u>C</u> | 0.65 | 1345, 1346, 4160, 4701                    | - | 1.4 | - | - | <b>2.5</b> | <b>2.2</b> |

<sup>a</sup> Scaled position from the hexaploid wheat consensus map (Cavanagh et al. 2013)

<sup>b</sup> SNP indexes from the Illumina iSelect 9K wheat assay (Cavanagh et al. 2013). **Bold**: QTL with Bonferroni  $P < 0.1$ .

\* Eleven SNPs that are also identified using all 875 accessions.

<sup>c</sup> SNP variant associated to the resistant response is underlined.

<sup>d</sup> Frequency of the favorable SNP variant.

<sup>e</sup> SNP loci in LD with the representative SNP and significantly associated to the *Pst* response.

<sup>f</sup> IT= infection type, SEV= disease severity. IT-ALL and SEV-ALL, best linear unbiased estimates (BLUEs) over all environments.

<sup>g</sup> Significances are reported as  $-\log(P \text{ value})$  as follows: '-' = not-significant, 1.3 =  $P=0.05$ , values  $> 2$  are in **bold**, and value  $\geq 4$  (experiment-wise significant at  $\alpha = 0.10$ ) are in **bold underlined**.

<sup>h</sup> Additional associated SNPs: IWA1092, 919, 920, 7992, 8322, 3893, 846, 1791, 724, 7892, 6831

<sup>i</sup> Additional associated SNPs: IWA1102, 1127, 1128, 1129, 1130, 1131, 1177, 1188, 1229, 1237, 4604, 4606, 771, 776, 777, 829, 869, 874
