# Supplementary material for: A Genome-Wide Association Study of Resistance to Stripe Rust (Puccinia striiformis f. sp. tritici) in a Worldwide Collection of Hexaploid Spring Wheat (Triticum aestivum L.)
Source: PubMed Central journal article supplement (PMC4349098; doi:10.1534/g3.114.014563), 2015-01-20
Supplement: supp_g3.114.014563_TableS6.pdf [file supp_g3.114.014563_TableS6.pdf]

**Table S6** Frequencies across the seven subpopulations of favorable alleles for the QTL-tagging SNPs detected in the complete GWAS (875 accessions).

| Chr. | Pos. <sup>a</sup><br>(cM) | QTL-representative SNP |                      |                    | Pop. genetic structure (sub-groups by Ward clustering) |            |            |            |            |            |            |
|------|---------------------------|------------------------|----------------------|--------------------|--------------------------------------------------------|------------|------------|------------|------------|------------|------------|
|      |                           | Index <sup>b</sup>     | Alleles <sup>c</sup> | Freq. <sup>d</sup> | 1A<br>(134)                                            | 1B<br>(84) | 2<br>(169) | 3<br>(285) | 4A<br>(90) | 4B<br>(69) | 4C<br>(44) |
| 1A   | 39.0                      | IWA6441                | T/C                  | 0.56               | 0.62                                                   | 0.73       | 0.56       | 0.59       | 0.58       | 0.49       | 0.37       |
| 1A   | 58.0                      | IWA5194                | A/G                  | 0.32               | 0.34                                                   | 0.05       | 0.17       | 0.63       | 0.09       | 0.10       | 0.56       |
| 1A   | 59.6                      | IWA4061                | A/G                  | 0.63               | 0.83                                                   | 0.96       | 0.84       | 0.34       | 0.51       | 0.84       | 0.71       |
| 1A   | 84.2                      | IWA3475                | T/C                  | 0.58               | 0.71                                                   | 0.48       | 0.6        | 0.32       | 0.87       | 0.99       | 0.86       |
| 1A   | 88.1                      | IWA5174                | A/C                  | 0.39               | 0.59                                                   | 0.64       | 0.33       | 0.51       | 0.11       | 0.03       | 1.00       |
| 1A   | 120.3                     | IWA1225                | T/G                  | 0.69               | 0.74                                                   | 0.64       | 0.75       | 0.51       | 0.93       | 0.97       | 1.00       |
| 1A   | 148.1                     | IWA672                 | A/G                  | 0.36               | 0.25                                                   | 0.38       | 0.53       | 0.56       | 0.12       | 0.10       | 0.00       |
| 1A   | 158.6                     | IWA7893                | T/C                  | 0.83               | 0.68                                                   | 0.77       | 0.95       | 0.94       | 0.83       | 0.59       | 0.93       |
| 1A   | 173.7                     | IWA2035                | A/G                  | 0.63               | 0.69                                                   | 0.63       | 0.65       | 0.86       | 0.38       | 0.36       | 0.05       |
| 1B   | 35.5                      | IWA962                 | A/G                  | 0.14               | 0.19                                                   | 0.67       | 0.07       | 0.06       | 0.19       | 0.00       | 0.86       |
| 1B   | 51.9                      | IWA6758                | A/G                  | 0.31               | 0.36                                                   | 0.55       | 0.35       | 0.26       | 0.15       | 0.46       | 0.95       |
| 1B   | 57.6                      | IWA3307                | T/C                  | 0.49               | 0.64                                                   | 0.12       | 0.36       | 0.62       | 0.49       | 0.60       | 0.19       |
| 1B   | 94.7                      | IWA3017                | A/G                  | 0.11               | 0.23                                                   | 0.06       | 0.04       | 0.14       | 0.12       | 0.01       | 0.23       |
| 1B   | 109.3                     | IWA1825                | T/C                  | 0.35               | 0.37                                                   | 0.23       | 0.58       | 0.47       | 0.07       | 0.29       | 0.02       |
| 1B   | 123.4                     | <b>IWA3892</b>         | A/G                  | 0.70               | 0.77                                                   | 0.87       | 0.70       | 0.76       | 0.53       | 0.77       | 0.70       |
| 1B   | 141.2                     | IWA2077                | A/G                  | 0.18               | 0.15                                                   | 0.05       | 0.05       | 0.15       | 0.61       | 0.41       | 0.05       |
| 1D   | 21.4                      | IWA2547                | T/C                  | 0.11               | 0.19                                                   | 0.05       | 0.10       | 0.16       | 0.02       | 0.10       | 0.12       |
| 2A   | 9.9                       | <b>IWA422</b>          | T/C                  | 0.31               | 0.35                                                   | 0.10       | 0.19       | 0.25       | 0.56       | 0.77       | 0.93       |
| 2A   | 62.2                      | IWA3520                | A/C                  | 0.52               | 0.34                                                   | 0.25       | 0.54       | 0.72       | 0.36       | 0.62       | 0.21       |
| 2A   | 78.3                      | <b>IWA424</b>          | T/C                  | 0.70               | 0.48                                                   | 0.83       | 0.80       | 0.88       | 0.26       | 0.97       | 0.35       |
| 2A   | 96.2                      | IWA5272                | A/G                  | 0.52               | 0.51                                                   | 0.68       | 0.33       | 0.78       | 0.07       | 0.86       | 0.00       |
| 2A   | 110.6                     | IWA7947                | A/C                  | 0.71               | 0.73                                                   | 0.88       | 0.60       | 0.82       | 0.64       | 0.75       | 0.49       |
| 2A   | 160.2                     | IWA200                 | A/G                  | 0.84               | 0.87                                                   | 0.92       | 0.80       | 0.83       | 0.93       | 1.00       | 0.93       |
| 2B   | 112.3                     | IWA905                 | A/G                  | 0.82               | 0.65                                                   | 0.95       | 0.86       | 0.81       | 0.98       | 0.84       | 1.00       |
| 2B   | 147.3                     | IWA586                 | T/C                  | 0.62               | 0.52                                                   | 0.79       | 0.78       | 0.70       | 0.34       | 0.68       | 0.91       |
| 2B   | 163.4                     | IWA226                 | T/C                  | 0.54               | 0.54                                                   | 0.44       | 0.34       | 0.64       | 0.88       | 0.52       | 0.98       |
| 2B   | 266.4                     | IWA3206                | T/C                  | 0.12               | 0.26                                                   | 0.31       | 0.18       | 0.06       | 0.01       | 0.04       | 0.00       |
| 3A   | 13.2                      | IWA5969                | T/C                  | 0.14               | 0.09                                                   | 0.42       | 0.24       | 0.22       | 0.02       | 0.01       | 0.07       |
| 3A   | 27.5                      | IWA2049                | T/C                  | 0.14               | 0.35                                                   | 0.20       | 0.14       | 0.07       | 0.15       | 0.01       | 0.88       |
| 3A   | 35.0                      | IWA1996                | A/G                  | 0.87               | 0.88                                                   | 0.93       | 0.96       | 0.78       | 0.98       | 0.93       | 1.00       |
| 3A   | 59.4                      | IWA5039                | T/C                  | 0.64               | 0.52                                                   | 0.81       | 0.85       | 0.79       | 0.24       | 0.83       | 0.19       |
| 3A   | 70.4                      | IWA8215                | T/G                  | 0.27               | 0.36                                                   | 0.05       | 0.11       | 0.41       | 0.13       | 0.48       | 0.00       |
| 3A   | 75.2                      | IWA7011                | A/G                  | 0.24               | 0.15                                                   | 0.04       | 0.18       | 0.31       | 0.13       | 0.79       | 0.02       |
| 3A   | 102.9                     | IWA2332                | A/G                  | 0.35               | 0.42                                                   | 0.26       | 0.54       | 0.24       | 0.22       | 0.54       | 0.93       |
| 3B   | 3.9                       | <b>IWA5202</b>         | A/G                  | 0.37               | 0.41                                                   | 0.52       | 0.47       | 0.40       | 0.09       | 0.32       | 0.12       |
| 3B   | 57.4                      | IWA6632                | A/C                  | 0.75               | 0.89                                                   | 0.85       | 0.83       | 0.69       | 0.54       | 0.83       | 0.44       |
| 3B   | 73.8                      | IWA377                 | T/C                  | 0.76               | 0.96                                                   | 0.75       | 0.96       | 0.87       | 0.23       | 0.61       | 0.98       |
| 3B   | 77.5                      | IWA8480                | A/G                  | 0.14               | 0.13                                                   | 0.12       | 0.09       | 0.18       | 0.15       | 0.10       | 0.98       |
| 3B   | 84.5                      | IWA5890                | T/C                  | 0.53               | 0.61                                                   | 0.81       | 0.40       | 0.62       | 0.34       | 0.41       | 1.00       |
| 3B   | 95.5                      | IWA6221                | T/C                  | 0.75               | 0.91                                                   | 0.67       | 0.85       | 0.81       | 0.49       | 0.64       | 1.00       |

|                                               |       |                |             |      |      |      |      |      |      |      |      |
|-----------------------------------------------|-------|----------------|-------------|------|------|------|------|------|------|------|------|
| 3B                                            | 101.4 | IWA321         | <u>T/C</u>  | 0.11 | 0.29 | 0.27 | 0.16 | 0.02 | 0.00 | 0.00 | 0.00 |
| 4A                                            | 35.2  | IWA6100        | A/ <u>G</u> | 0.33 | 0.09 | 0.16 | 0.34 | 0.39 | 0.49 | 0.75 | 0.09 |
| 4A                                            | 44.0  | IWA1992        | A/ <u>G</u> | 0.58 | 0.56 | 0.25 | 0.42 | 0.68 | 0.60 | 0.78 | 0.93 |
| 4A                                            | 54.9  | IWA7216        | <u>T/C</u>  | 0.53 | 0.59 | 0.45 | 0.23 | 0.48 | 0.81 | 0.91 | 1.00 |
| 4A                                            | 68.1  | IWA1570        | <u>T/G</u>  | 0.17 | 0.55 | 0.06 | 0.10 | 0.10 | 0.16 | 0.01 | 1.00 |
| 4A                                            | 167.3 | IWA2170        | A/ <u>G</u> | 0.37 | 0.53 | 0.49 | 0.36 | 0.31 | 0.50 | 0.23 | 0.86 |
| 4A                                            | 181.7 | <b>IWA1034</b> | <u>T/C</u>  | 0.17 | 0.08 | 0.04 | 0.03 | 0.17 | 0.39 | 0.28 | 0.00 |
| 4B                                            | 85.2  | IWA6461        | <u>T/C</u>  | 0.54 | 0.66 | 0.81 | 0.83 | 0.59 | 0.15 | 0.09 | 0.09 |
| 4D                                            | 26.9  | <b>IWA5375</b> | <u>T/G</u>  | 0.10 | 0.38 | 0.12 | 0.05 | 0.02 | 0.10 | 0.01 | 0.88 |
| 5A                                            | 4.9   | IWA2144        | <u>T/C</u>  | 0.19 | 0.37 | 0.45 | 0.21 | 0.18 | 0.02 | 0.01 | 0.6  |
| 5A                                            | 119.3 | IWA1486        | <u>T/C</u>  | 0.24 | 0.28 | 0.19 | 0.28 | 0.27 | 0.08 | 0.67 | 0.28 |
| 5A                                            | 189.2 | <b>IWA6988</b> | <u>T/C</u>  | 0.16 | 0.17 | 0.10 | 0.12 | 0.15 | 0.38 | 0.23 | 0.88 |
| 5A                                            | 194.9 | IWA2646        | A/ <u>G</u> | 0.35 | 0.35 | 0.31 | 0.62 | 0.39 | 0.27 | 0.33 | 0.14 |
| 5B                                            | 0.0   | IWA868         | <u>T/C</u>  | 0.19 | 0.05 | 0.00 | 0.11 | 0.23 | 0.43 | 0.35 | 0.02 |
| 5B                                            | 68.3  | IWA7227        | <u>T/C</u>  | 0.31 | 0.16 | 0.58 | 0.18 | 0.4  | 0.45 | 0.47 | 0.00 |
| 5B                                            | 85.9  | IWA3633        | <u>T/C</u>  | 0.54 | 0.69 | 0.83 | 0.57 | 0.61 | 0.07 | 0.03 | 0.00 |
| 5B                                            | 119.9 | IWA4280        | A/ <u>G</u> | 0.10 | 0.16 | 0.49 | 0.09 | 0.08 | 0.01 | 0.00 | 0.00 |
| 5B                                            | 205.8 | IWA22          | A/ <u>G</u> | 0.26 | 0.19 | 0.22 | 0.24 | 0.28 | 0.29 | 0.52 | 0.00 |
| 6A                                            | 75.5  | IWA4824        | A/ <u>G</u> | 0.44 | 0.21 | 0.1  | 0.71 | 0.38 | 0.78 | 0.42 | 0.98 |
| 6A                                            | 114.5 | IWA6596        | <u>T/C</u>  | 0.51 | 0.51 | 0.4  | 0.60 | 0.73 | 0.22 | 0.38 | 0.02 |
| 6A                                            | 217.7 | IWA3066        | A/ <u>G</u> | 0.72 | 0.84 | 0.63 | 0.91 | 0.70 | 0.73 | 0.48 | 0.91 |
| 6B                                            | 37.9  | IWA8134        | <u>T/C</u>  | 0.10 | 0.05 | 0.01 | 0.25 | 0.17 | 0.1  | 0.04 | 0.02 |
| 6B                                            | 38.5  | IWA2888        | <u>T/C</u>  | 0.65 | 0.87 | 0.45 | 0.78 | 0.61 | 0.82 | 0.58 | 0.98 |
| 6B                                            | 50.8  | IWA7625        | A/ <u>G</u> | 0.44 | 0.20 | 0.10 | 0.71 | 0.38 | 0.78 | 0.42 | 0.98 |
| 6B                                            | 84.5  | IWA6770        | A/ <u>G</u> | 0.52 | 0.18 | 0.54 | 0.38 | 0.70 | 0.76 | 0.28 | 0.79 |
| 6B                                            | 112.3 | <b>IWA7257</b> | <u>T/G</u>  | 0.23 | 0.61 | 0.32 | 0.51 | 0.11 | 0.06 | 0.01 | 0.00 |
| 6D2                                           | 68.6  | IWA7816        | A/ <u>G</u> | 0.63 | 0.67 | 0.52 | 0.70 | 0.49 | 0.91 | 0.86 | 1.00 |
| 6D2                                           | 73.2  | <b>IWA167</b>  | A/ <u>C</u> | 0.10 | 0.36 | 0.10 | 0.03 | 0.06 | 0.05 | 0.01 | 0.95 |
| 7A                                            | 6.2   | IWA7306        | A/ <u>G</u> | 0.53 | 0.45 | 0.74 | 0.50 | 0.56 | 0.56 | 0.87 | 0.29 |
| 7A                                            | 49.9  | IWA7121        | <u>T/G</u>  | 0.70 | 0.68 | 0.83 | 0.51 | 0.76 | 0.64 | 0.99 | 0.88 |
| 7A                                            | 105.5 | IWA7549        | A/ <u>C</u> | 0.83 | 0.84 | 1.00 | 0.83 | 0.77 | 0.94 | 1.00 | 1.00 |
| 7B                                            | 40.6  | IWA1108        | <u>T/C</u>  | 0.27 | 0.22 | 0.42 | 0.25 | 0.33 | 0.17 | 0.35 | 0.16 |
| 7B                                            | 107.4 | IWA615         | <u>T/C</u>  | 0.18 | 0.18 | 0.18 | 0.10 | 0.27 | 0.20 | 0.03 | 1.00 |
| N. of favorable alleles with freq. >0.90      |       |                |             | 2    | 5    | 4    | 1    | 6    | 8    | 26   |      |
| N. of favorable alleles with freq. <0.10      |       |                |             | 5    | 10   | 9    | 8    | 15   | 17   | 21   |      |
| Percent >0.9 + <0.10 by subpopulation         |       |                |             | 9.6  | 20.5 | 17.8 | 12.3 | 28.8 | 34.2 | 64.4 |      |
| Average Genetic diversity (based on all SNPs) |       |                |             | 0.39 | 0.34 | 0.34 | 0.38 | 0.27 | 0.26 | 0.13 |      |

<sup>a</sup> Scaled position from hexaploid wheat consensus map (Cavanagh et al. 2013).

<sup>b</sup> SNP indexes from Illumina iSelect 9K wheat assay (Cavanagh et al. 2013).

<sup>c</sup> SNP variant associated to the resistant response is underlined.

<sup>d</sup> Frequency of the favorable SNP variant.

**Bold name:** SNPs significant for Bonferroni P<0.10 (experiment-wise error rate), **yellow:** allele frequency < 0.1, **green:** allele frequency > 0.9.
