# Supplementary material for: A Genome-Wide Association Study of Resistance to Stripe Rust (Puccinia striiformis f. sp. tritici) in a Worldwide Collection of Hexaploid Spring Wheat (Triticum aestivum L.)
Source: PubMed Central journal article supplement (PMC4349098; doi:10.1534/g3.114.014563), 2015-01-20
Supplement: supp_g3.114.014563_TableS7.pdf [file supp_g3.114.014563_TableS7.pdf]

**Table S7** Frequencies across the seven subpopulations of the favorable alleles for SNPs detected in the GWAS for partial resistance (593 accessions). Only the 24 QTL that were not redundant with Table S6 are listed below.

| Chr.                                     | Pos. <sup>a</sup><br>(cM) | QTL-representative SNP |                      |                    | Pop. genetic structure (sub-groups by Ward clustering) |          |          |          |          |          |          |
|------------------------------------------|---------------------------|------------------------|----------------------|--------------------|--------------------------------------------------------|----------|----------|----------|----------|----------|----------|
|                                          |                           | Index <sup>b</sup>     | Alleles <sup>c</sup> | Freq. <sup>d</sup> | 1A<br>134                                              | 1B<br>84 | 2<br>169 | 3<br>285 | 4A<br>90 | 4B<br>69 | 4C<br>44 |
| 1A                                       | 28.2                      | IWA414                 | T/ <u>G</u>          | 0.62               | 0.72                                                   | 0.94     | 0.73     | 0.50     | 0.48     | 0.63     | 0.95     |
| 1A                                       | 111.2                     | IWA577                 | <u>A</u> /C          | 0.46               | 0.47                                                   | 0.29     | 0.50     | 0.28     | 0.67     | 0.78     | 1.00     |
| 1B                                       | 93.5                      | IWA5769                | A/ <u>G</u>          | 0.2                | 0.26                                                   | 0.08     | 0.07     | 0.24     | 0.44     | 0.01     | 0.36     |
| 1D                                       | 49.3                      | <b>IWA980</b>          | <u>A</u> /C          | 0.44               | 0.19                                                   | 0.17     | 0.70     | 0.60     | 0.34     | 0.43     | 0.20     |
| 1D                                       | 91.5                      | IWA2341                | T/ <u>C</u>          | 0.37               | 0.69                                                   | 0.22     | 0.63     | 0.28     | 0.11     | 0.29     | 0.00     |
| 2A                                       | 177.7                     | IWA3576                | T/ <u>C</u>          | 0.18               | 0.12                                                   | 0.02     | 0.19     | 0.02     | 0.41     | 0.62     | 0.11     |
| 2B                                       | 126.3                     | IWA4606                | T/ <u>C</u>          | 0.39               | 0.49                                                   | 0.66     | 0.43     | 0.43     | 0.07     | 0.49     | 0.02     |
| 2B                                       | 149.4                     | IWA7312                | <u>A</u> /G          | 0.81               | 0.55                                                   | 0.86     | 0.82     | 0.86     | 0.94     | 1.00     | 0.91     |
| 2B                                       | 197.2                     | IWA5177                | <u>T</u> /C          | 0.81               | 0.92                                                   | 0.98     | 0.82     | 0.90     | 0.60     | 0.71     | 0.09     |
| 3A                                       | 59.4                      | IWA6877                | <u>T</u> /C          | 0.11               | 0.15                                                   | 0.60     | 0.07     | 0.14     | 0.00     | 0.00     | 0.00     |
| 3B                                       | 88.1                      | IWA4085                | T/ <u>C</u>          | 0.68               | 0.54                                                   | 0.80     | 0.72     | 0.69     | 0.79     | 0.43     | 1.00     |
| 4B                                       | 26.4                      | IWA8109                | A/ <u>G</u>          | 0.72               | 0.75                                                   | 0.88     | 0.73     | 0.75     | 0.53     | 0.62     | 0.98     |
| 4B                                       | 116.4                     | IWA27                  | A/ <u>G</u>          | 0.62               | 0.79                                                   | 0.82     | 0.81     | 0.56     | 0.15     | 0.59     | 1.00     |
| 5B                                       | 115.3                     | IWA8069                | <u>A</u> /G          | 0.28               | 0.25                                                   | 0.51     | 0.33     | 0.30     | 0.06     | 0.46     | 0.02     |
| 6A                                       | 138.6                     | IWA3491                | <u>T</u> /C          | 0.84               | 0.81                                                   | 0.60     | 0.95     | 0.87     | 0.67     | 0.97     | 0.77     |
| 6B                                       | 0.6                       | IWA1493                | A/ <u>C</u>          | 0.14               | 0.35                                                   | 0.15     | 0.18     | 0.11     | 0.00     | 0.00     | 0.00     |
| 6B                                       | 60.1                      | IWA2090                | <u>A</u> /G          | 0.2                | 0.60                                                   | 0.40     | 0.07     | 0.09     | 0.00     | 0.00     | 0.00     |
| 6B                                       | 118.5                     | IWA404                 | <u>T</u> /C          | 0.69               | 0.92                                                   | 0.81     | 0.79     | 0.54     | 0.70     | 0.71     | 1.00     |
| 7A                                       | 56.4                      | IWA3715                | T/ <u>C</u>          | 0.62               | 0.59                                                   | 0.63     | 0.44     | 0.78     | 0.69     | 0.58     | 0.89     |
| 7A                                       | 106.2                     | IWA2011                | <u>A</u> /G          | 0.69               | 0.78                                                   | 0.79     | 0.55     | 0.65     | 0.92     | 0.54     | 0.98     |
| 7A                                       | 145.3                     | IWA4483                | <u>A</u> /G          | 0.57               | 0.82                                                   | 0.69     | 0.69     | 0.46     | 0.56     | 0.19     | 0.86     |
| 7B                                       | 48.0                      | IWA8525                | A/ <u>G</u>          | 0.26               | 0.23                                                   | 0.14     | 0.14     | 0.29     | 0.50     | 0.17     | 0.86     |
| 7B                                       | 65.6                      | IWA3437                | A/ <u>G</u>          | 0.59               | 0.80                                                   | 0.75     | 0.40     | 0.70     | 0.44     | 0.19     | 0.98     |
| 7B                                       | 99.0                      | IWA4701                | T/ <u>C</u>          | 0.65               | 0.70                                                   | 0.79     | 0.69     | 0.53     | 0.68     | 0.68     | 0.23     |
| N. of favorable alleles with freq. >0.90 |                           |                        |                      |                    | 2                                                      | 2        | 1        | 0        | 2        | 2        | 8        |
| N. of favorable alleles with freq. <0.10 |                           |                        |                      |                    | 0                                                      | 2        | 3        | 1        | 5        | 4        | 7        |
| Percent >0.9 + <0.10 by subpopulation    |                           |                        |                      |                    | 8.3                                                    | 16.7     | 16.7     | 4.2      | 29.2     | 25.0     | 62.5     |

<sup>a</sup> Scaled position from hexaploid wheat consensus map (Cavanagh et al. 2013).

<sup>b</sup> SNP indexes from Illumina iSelect 9K wheat assay (Cavanagh et al. 2013).

<sup>c</sup> SNP variant associated to the resistant response is underlined.

<sup>d</sup> Frequency of the favorable SNP variant.

**Bold name:** SNPs significant for Bonferroni  $P < 0.10$  (experiment-wise error rate), **yellow:** allele frequency  $< 0.1$ , **green:** allele frequency  $> 0.9$ .
