# Supplementary material for: A Genome-Wide Association Study of Resistance to Stripe Rust (Puccinia striiformis f. sp. tritici) in a Worldwide Collection of Hexaploid Spring Wheat (Triticum aestivum L.)
Source: PubMed Central journal article supplement (PMC4349098; doi:10.1534/g3.114.014563), 2015-01-20
Supplement: supp_g3.114.014563_TableS8.pdf [file supp_g3.114.014563_TableS8.pdf]

**Table S8 ANOVA for *Pst* infection type (IT) and severity (SEV) based on 10 significant QTL and population structure (Q7) as covariable.** P values are presented for the structure alone, the structure and the 10 QTL, and the structure plus the 10 QTL plus the significant interactions.

| Source                | Structure alone |        | Structure & 10 QTL |        | Structure & 10 QTL & 6 int. |        |
|-----------------------|-----------------|--------|--------------------|--------|-----------------------------|--------|
|                       | IT              | SEV    | IT                 | SEV    | IT                          | SEV    |
| Q1                    | 0.0086          | 0.0011 | 0.3547             | 0.3673 | 0.7763                      | 0.7429 |
| Q2                    | 0.0544          | 0.0386 | 0.0019             | 0.0034 | 0.0004                      | 0.0008 |
| Q3                    | <.0001          | <.0001 | 0.7441             | 0.6287 | 0.234                       | 0.6761 |
| Q4                    | <.0001          | <.0001 | 0.6426             | 0.8195 | 0.2053                      | 0.2891 |
| Q5                    | 0.0898          | 0.0395 | 0.3596             | 0.4114 | 0.1244                      | 0.1339 |
| Q6                    | <.0001          | <.0001 | 0.0001             | <.0001 | 0.0014                      | <.0001 |
| IWA980                |                 |        | 0.0001             | <.0001 | 0.0096                      | 0.0092 |
| IWA3892               |                 |        | 0.0001             | 0.0001 | 0.0001                      | <.0001 |
| IWA1034               |                 |        | 0.0020             | 0.0083 | 0.0003                      | 0.0003 |
| IWA422                |                 |        | <.0001             | <.0001 | 0.1813                      | 0.2471 |
| IWA424                |                 |        | 0.1756             | 0.0429 | 0.6596                      | 0.4986 |
| IWA5202               |                 |        | <.0001             | 0.0526 | 0.3835                      | 0.6191 |
| IWA5375               |                 |        | 0.0005             | <.0001 | 0.0024                      | 0.0005 |
| IWA6988               |                 |        | 0.0008             | 0.0072 | 0.0002                      | 0.0017 |
| IWA7257               |                 |        | <.0001             | 0.0004 | 0.0102                      | 0.1154 |
| IWA167                |                 |        | <.0001             | <.0001 | <.0001                      | <.0001 |
| IWA1034*IWA424        |                 |        |                    |        | 0.0419                      | 0.0023 |
| IWA980*IWA5202        |                 |        |                    |        | 0.0447                      | 0.0877 |
| IWA422*IWA6988        |                 |        |                    |        | <.0001                      | <.0001 |
| IWA422*IWA7257        |                 |        |                    |        | 0.0011                      | 0.0034 |
| IWA5202*IWA167        |                 |        |                    |        | 0.0259                      | 0.0191 |
| IWA6988*IWA167        |                 |        |                    |        | 0.0047                      | 0.0087 |
| <i>R</i> <sup>2</sup> | 0.141           | 0.167  | 0.290              | 0.285  | 0.330                       | 0.324  |
