# Supplementary material for: A Genome-Wide Association Study of Resistance to Stripe Rust (Puccinia striiformis f. sp. tritici) in a Worldwide Collection of Hexaploid Spring Wheat (Triticum aestivum L.)
Source: PubMed Central journal article supplement (PMC4349098; doi:10.1534/g3.114.014563), 2015-01-20
Supplement: supp_g3.114.014563_TableS9.pdf [file supp_g3.114.014563_TableS9.pdf]

**Table S9** Pairwise fixation indexes (*Fst*) among populations based on 4,585 SNPs. All comparisons are significant at  $P < 0.001$  with 1000 permutations.

| Subgroup | 1A    | 1B    | 2     | 3     | 4A    | 4B    | 4C    |
|----------|-------|-------|-------|-------|-------|-------|-------|
| 1A       | 0.000 |       |       |       |       |       |       |
| 1B       | 0.105 | 0.000 |       |       |       |       |       |
| 2        | 0.109 | 0.127 | 0.000 |       |       |       |       |
| 3        | 0.106 | 0.117 | 0.087 | 0.000 |       |       |       |
| 4A       | 0.213 | 0.276 | 0.255 | 0.225 | 0.000 |       |       |
| 4B       | 0.212 | 0.263 | 0.202 | 0.184 | 0.200 | 0.000 |       |
| 4C       | 0.304 | 0.427 | 0.402 | 0.360 | 0.296 | 0.447 | 0.000 |
