# Supplementary material for: A Genome-Wide Association Study of Resistance to Stripe Rust (Puccinia striiformis f. sp. tritici) in a Worldwide Collection of Hexaploid Spring Wheat (Triticum aestivum L.)
Source: PubMed Central journal article supplement (PMC4349098; doi:10.1534/g3.114.014563), 2015-01-20
Supplement: supp_g3.114.014563_TableS10.pdf [file supp_g3.114.014563_TableS10.pdf]

**Table S10** Number of 9K SNP mapped and 90K SNP projected into the confidence intervals of the 10 significant QTL described in Table 3. A tentative annotation for the wheat contigs including these SNPs was inferred from annotations in the Phytozome database based on the best hits in rice and *Brachypodium* protein databases. Detailed information for each SNP is provided in supplemental File S2. Plant resistance proteins (*R* genes) include CC-NB-LRR (coiled-coil domain, nucleotide binding site, leucine-rich repeat), RLP (receptor like proteins coupled with extracellular LRR) and RLK (kinase domain coupled with LRR).

| Marker         | Chr.            | Position<br>cM | No. SNP in QTL CI |                                  |       | Functional annotation            |                          |
|----------------|-----------------|----------------|-------------------|----------------------------------|-------|----------------------------------|--------------------------|
|                |                 |                | 9k-anchor<br>SNP  | Additional 90k-<br>projected SNP | Total | No. of<br>annotated<br>orthologs | No. of<br><i>R</i> genes |
| <i>IWA3892</i> | 1B              | 123.4          | 8                 | 41                               | 49    | 26                               | 5                        |
| <i>IWA980</i>  | 1D              | 49.3           | 14                | 110                              | 124   | 68                               | 5                        |
| <i>IWA422</i>  | 2A              | 9.9            | 24                | 194                              | 218   | 140                              | 35                       |
| <i>IWA424</i>  | 2A              | 78.3           | 27                | 201                              | 218   | 146                              | 3                        |
| <i>IWA5202</i> | 3B              | 3.9            | 18                | 88                               | 106   | 74                               | 16                       |
| <i>IWA1034</i> | 4A <sup>a</sup> | 181.7          | 12                | 11                               | 23    | 19                               | 10                       |
| <i>IWA5375</i> | 4D              | 26.9           | 7                 | 49                               | 56    | 47                               | 1                        |
| <i>IWA6988</i> | 5A <sup>b</sup> | 189.2          | 3                 | 21                               | 24    | 15                               | 0                        |
| <i>IWA7257</i> | 6B              | 112.3          | 4                 | 24                               | 28    | 19                               | 0                        |
| <i>IWA167</i>  | 6D              | 73.2           | 8                 | 64                               | 76    | 54                               | 2                        |
| <b>Total</b>   |                 |                | 119               | 803                              | 922   | 608                              | 77                       |

<sup>a</sup> *IWA1034* is in the region of 4AL translocated from 7BS (homology 7AS/4AL/7DS).

<sup>b</sup> *IWA6988* is in the region of 5AL translocated from 4AL (homology 5AL/4BL/4DL).
